# Supplementary material
Source: PubMed Central journal article supplement (PMC3208615)
Supplement: supp_45_4_889__1.pdf [file supp_45_4_889__1.pdf]

## Online Data Supplement

### Activation of $\beta_1$ Integrins on Blood Eosinophils by P-Selectin

Mats W. Johansson and Deane F. Mosher

#### MATERIALS AND METHODS

##### Antibodies

Monoclonal antibodies to  $\beta_1$  integrin MAR4 and mAb13, activation-sensitive anti- $\beta_1$  N29, activation-sensitive anti- $\beta_2$  mAb24, phycoerythrin (PE)-conjugated goat anti-mouse and anti-rat IgG antibodies, FITC-conjugated goat anti-mouse IgG, FITC-conjugated anti-CD14 and anti-CD16, and isotype controls mouse IgG<sub>1</sub> and rat IgG<sub>2a</sub> were as described (E1, E2). The following additional antibodies were also used. Activation-sensitive anti- $\beta_1$  integrin mAb 8E3 (E3) was a gift from Martin Humphries (Wellcome Trust Center for Extracellular Matrix Research, Manchester, UK). Activation-sensitive anti- $\beta_1$  9EG7 (E4), anti-P-selectin AC1.2, anti-PSGL-1 KPL-1, and allophycocyanin (APC)-conjugated anti-P-selectin AK-4 were from BD Biosciences (San Jose, CA). Anti-eosinophil major basic protein (MBP) BMK13 and anti-eosinophil peroxidase (EPO) AHE-1 were from Chemicon (Temecula, CA). Anti- $\alpha_{IIb}$  HIP8 was from Exbio (Vestec, Czech Republic). Anti- $\alpha_{IIb}$  VIPL3 was from Invitrogen (Carlsbad, CA). Rhodamine Red X-conjugated goat anti-rat IgG (with minimal reactivity to mouse) and FITC-conjugated donkey anti-mouse IgG (with minimal reactivity to rat) for double immunofluorescence microscopy staining were from Jackson ImmunoResearch Laboratories (West Grove, PA). Rhodamine-conjugated avidin was from Miles-Yeda (Israel). Anti-thrombospondin (TSP)-1 HB8432 (E5) was biotinylated as described (E6).

##### Flow cytometry

Venous blood was drawn into standard lavender-top EDTA tubes (BD Vacutainer Systems, Franklin Lakes, NJ) and directly processed for flow cytometry as described (E2). Eosinophils, neutrophils, and monocytes were gated based on scatter and lack of reactivity with anti-CD14 and anti-CD16 as before (E2). Data are expressed, as before, as specific geometric mean channel fluorescence (gMCF) =  $1,024 \times \log$  geometric mean fluorescence of the experimental sample -  $1,024 \times \log$  geometric mean fluorescence of the isotype control (E2, E7). Mid-range one-peak rainbow fluorescent beads (Spherotech, Lake Forest, IL) were run at setup in order to set the sensitivity of the detectors at a standardized fluorescence intensity. Post-data-collection compensation was performed using matrix algebra by FlowJo (TreeStar, Ashland, OR).

For double labeling, blood was incubated with unlabeled primary and phycoerythrin (PE)-conjugated secondary antibodies as usual, followed by resuspension in 100  $\mu$ l FACS buffer (PBS with 2% BSA and 0.2% NaN<sub>3</sub>, pH 7.2) with APC-conjugated anti-P-selectin (20  $\mu$ l) and incubation for 30 min. After labeling, RBC were lysed and samples were fixed and prepared for data collection as before, and eosinophils were gated based on forward and side scatter (E2). The eosinophil population gated in this manner is 96%-100% pure, judged by immunofluorescence microscopy staining of

sorted and cytopun cells for eosinophil MBP (E2).

Purified eosinophils were incubated, fixed, and analyzed as described (E1), except that PE-conjugated secondary antibody (2  $\mu\text{g}/\text{ml}$ ) was used. Purified eosinophils or EoL-3 cells non-adherent to VCAM-1 were analyzed live. FITC-conjugated secondary antibody was used, followed by resuspension of cells in FACS buffer containing 1  $\mu\text{g}/\text{ml}$  propidium iodide, and immediate data collection. Live cells were gated based on forward scatter and lack of staining with propidium iodide.

### **Immunofluorescence microscopy**

One hundred  $\mu\text{l}$  of venous blood, drawn into EDTA tubes, was incubated for RBC lysis with 2 ml of FACS lysing solution (BD Biosciences) for 10 min at room temperature, followed by centrifugation for 10 min at  $260 \times g$  (1,200 rpm in a Sorvall Technospin R centrifuge, Du Pont, Wilmington, DE). The whole leukocyte pellet was resuspended in 500  $\mu\text{l}$  HBSS containing 2% BSA and centrifuged again at  $4^\circ\text{C}$ . Cells were resuspended in 1.5 ml of HBSS-2% BSA and cytopun onto microscope slides for 3 min at 600 rpm. The following steps were performed at room temperature. Cytospun cells were fixed first for 10 min with 1% EM-grade methanol-free paraformaldehyde (EM Sciences, Fort Washington, PA) in 75 mM sodium cacodylate buffer, pH 7.4, containing 0.72% sucrose; and then for 10 min with 3.7% EM-grade methanol-free formaldehyde (Polysciences, Warrington, PA) in PBS; washed by dipping the slide three times in PBS; permeabilized with 0.05% Triton X-100 in PBS for 4 min (for TSP-1, MBP, and EPO staining) or not (for  $\beta_1$  integrin and cell-surface P-selectin staining); washed; stained; mounted; and sealed under round glass coverslips (12 mm diameter, Fisher

Scientific, Pittsburgh, PA) as described (E1). Thirty  $\mu\text{l}$  of each fixative or antibody solution was added onto the area of the slide containing the cytopun cells. Primary antibodies, including biotinylated anti-TSP-1, or isotype controls were used at 10  $\mu\text{g}/\text{ml}$ . For double labeling of activated or total  $\beta_1$  integrin and P-selectin, cells were first incubated with a mixture of activation-sensitive rat anti- $\beta_1$  9EG7 or rat anti-total  $\beta_1$  mAb13 and mouse anti-P-selectin and then with a mixture of rhodamine-conjugated anti-rat and FITC-conjugated anti-mouse secondary antibodies. For double labeling experiments that included TSP-1, cells were first incubated with a  $\beta_1$  or P-selectin primary antibody, second with FITC-conjugated secondary antibody, then permeabilized, third incubated with biotinylated anti-TSP-1, and fourth with rhodamine-avidin. Samples were viewed in a BX60 microscope (Olympus, Melville, NY). An area with at least 500 leukocytes was observed on each coverslip. Representative eosinophils were photographed using a digital camera with the SPOT RT Advanced software (Diagnostic Instruments, Sterling Heights, MI).

### **Selective adhesion to VCAM-1**

Wells in six-well tissue culture treated plates (Corning, Corning, NY) were coated with 1 ml of recombinant soluble extracellular 7-domain-VCAM-1 (E1) in Tris-buffered saline (TBS) for 2 h at  $37^\circ\text{C}$ . The wells were washed with TBS, blocked with 0.1% gelatin (for purified eosinophils or whole blood) or 1% BSA (for EoL-3 cells) in TBS for 30 min at  $37^\circ\text{C}$ , and washed with TBS. One ml of purified blood eosinophils ( $4 \times 10^6/\text{ml}$ ) or EoL-3 cells ( $2 \times 10^6/\text{ml}$ ) in RPMI 1640 with 0.2% BSA; or venous blood, drawn from volunteer donors into heparin tubes and preincubated with 0.1  $\mu\text{g}/\text{ml}$  P-selectin for 1 h at  $37^\circ\text{C}$ ; was added to each

well. After incubation for 1 h at 37°C, non-adherent cells were harvested. Non-adherent purified eosinophils or EoL-3 cells were spun down for 10 min at 4°C at 1,200 (eosinophils) or 1,500 (EoL-3 cells) rpm, resuspended in 400 µl FACS buffer, and processed for flow cytometry. Non-adherent blood cells were processed directly for flow cytometry as described above without an intermediate centrifugation step.

#### **Adhesion under static conditions**

Wells in polystyrene non-tissue culture treated 96-well culture plates (BD Labware, Franklin Lakes, NJ) were coated with 100 µl of 1 µg/ml recombinant soluble extracellular

7-domain- or 6-domain-VCAM-1 (E1, E8) in TBS, pH 8.0, for 2 h at 37°C, decanted, blocked with 0.1% gelatin in TBS for 30 min at 37°C, and decanted. One hundred µl of venous blood, drawn from volunteer donors into heparin tubes, preincubated for 1 h at 37°C with or without different concentrations of P-selectin was added to each well and incubated for 1 h at 37°C, after which the wells were washed six times with TBS. Adherence of eosinophils was quantified by an EPO assay as described, with a chromogenic substrate and measurement of the absorbance of the colored product spectrophotometrically at 490 nm (E7, E8).

#### **References**

- E1. Johansson MW, Lye MH, Barthel SR, Duffy AK, Annis DS, Mosher DF. Eosinophils adhere to vascular cell adhesion molecule-1 via podosomes. *Am J Respir Cell Mol Biol* 2004;31:413-422.
- E2. Johansson MW, Kelly EA, Busse WW, Jarjour NN, Mosher DF. Up-regulation and activation of eosinophil integrins in blood and airway after segmental lung antigen challenge. *J Immunol* 2008;180:7622-7635.
- E3. Coe AP, Askari JA, Kline AD, Robinson MK, Kirby H, Stephens PE, Humphries MJ. Generation of a minimal alpha5beta1 integrin-Fc fragment. *J Biol Chem* 2001;276:35854-35866.
- E4. Bazzoni G, Shih DT, Buck CA, Hemler ME. Monoclonal antibody 9EG7 defines a novel beta 1 integrin epitope induced by soluble ligand and manganese, but inhibited by calcium. *J Biol Chem* 1995;270:25570-25577.
- E5. Jaffe EA, Ruggiero JT, Leung LK, Doyle MJ, McKeown-Longo PJ, Mosher DF. Cultured human fibroblasts synthesize and secrete thrombospondin and incorporate it into extracellular matrix. *Proc Natl Acad Sci U S A* 1983;80:998-1002.
- E6. Annis DS, Murphy-Ullrich JE, Mosher DF. Function-blocking antithrombospondin-1 monoclonal antibodies. *J Thromb Haemost* 2006;4:459-468.
- E7. Barthel SR, Jarjour NN, Mosher DF, Johansson MW. Dissection of the hyperadhesive phenotype of airway eosinophils in asthma. *Am J Respir Cell Mol Biol* 2006;35:378-386.
- E8. Barthel SR, Annis DS, Mosher DF, Johansson MW. Differential engagement of modules 1 and 4 of vascular cell adhesion molecule-1 (CD106) by integrins alpha4beta1 (CD49d/29) and alphaMbeta2 (CD11b/18) of eosinophils. *J Biol Chem* 2006;281:32175-32187.

## Figure Legends

**Figure E1.** Flow cytometric analysis of expression of anti-PSGL-1 or epitopes for activation-sensitive  $\beta_1$  integrin mAbs N29, 8E3, or 9EG7 versus anti-P-selectin on eosinophils in whole blood from a subject with non-severe allergic asthma. Representative of result of experiments with three subjects. (A) mouse IgG<sub>1</sub> isotype (control for B-D), (B) N29, (C) 8E3, (D) anti-PSGL-1, (E) rat IgG<sub>2a</sub> isotype (control for F), or (F) 9EG7 versus anti-P-selectin. Note P-selectin-high populations marked with ellipses.

**Figure E2.** Immunofluorescence microscopic localization of the platelet markers TSP-1 and  $\alpha_{IIb}$  integrin, and eosinophil MBP in eosinophils. Representative of results of experiments on cells from seven subjects with non-severe allergic asthma. Eosinophils in cytopun whole leukocytes were identified by positive staining for eosinophil MBP (B) or EPO (not shown), and by morphology (C, E). Micrographs of an eosinophil analyzed by staining with biotinylated mAb to TSP-1 and rhodamine-avidin (A), mAb to eosinophil MBP and FITC-conjugated anti-mouse secondary antibody (B), and by phase contrast (C). Micrographs of an eosinophil analyzed by staining with mAb VIPL3 to  $\alpha_{IIb}$  and FITC-conjugated anti-mouse secondary antibody (D), and by phase contrast (E). Note the characteristic eosinophil bilobed nucleus and areas in eosinophils positive for the platelet markers (arrowheads). Scale bar = 5  $\mu$ m.

**Figure E3.** Effect of added soluble P-selectin on specific expression of epitope for activation-sensitive anti- $\beta_1$  integrin mAb N29 on eosinophils in whole blood. N29 epitope expression after preincubation with (gray bars) or without (white bars) added soluble P-selectin (PS)(100 ng/ml) in normal (N), allergic rhinitic (non-asthmatic)(AR), or allergic asthmatic (AA) donors.  $n = 3$  N, 14 AR, and 13 AA donors. Error bars = SEM.  $**P \leq 0.01$  versus control without P-selectin.

**Figure E4.** Effect of added soluble P-selectin or IL-5 on specific expression of epitopes for activation-sensitive anti- $\beta_1$  integrin mAb N29 or activation-sensitive anti- $\beta_2$  integrin mAb24 on leukocytes in whole blood. N29 (A,C,E) or mAb24 (B,D,F) epitope expression on eosinophils (A,B), neutrophils (C,D), or monocytes (E,F) after preincubation without (white bars) or with added soluble P-selectin (PS, 100 ng/ml)(light gray bars) or IL-5 (50 ng/ml)(dark gray bars).  $n = 5$  donors whose eosinophils responded to P-selectin. Error bars = SEM.  $*P \leq 0.05$  versus control (ctrl).
