# Supplementary material
Source: PubMed Central journal article supplement (PMC3208615)

**A**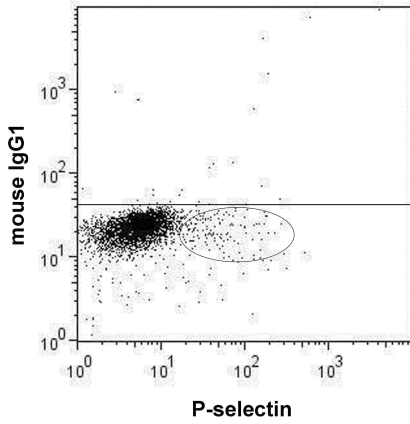**B**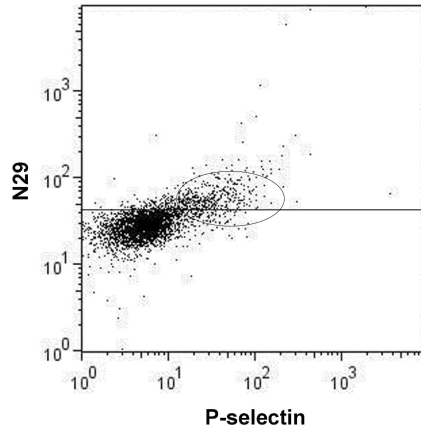**C**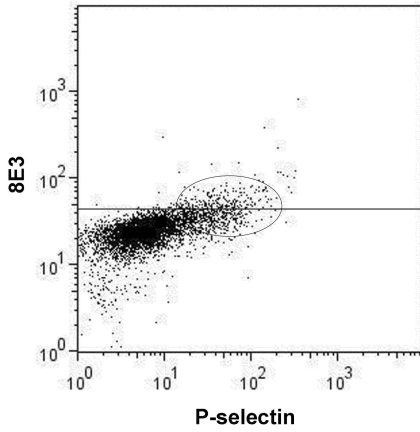**D**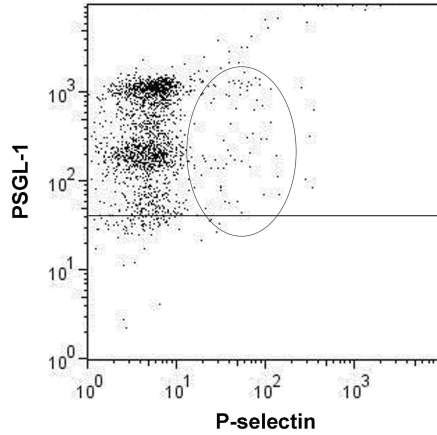**E**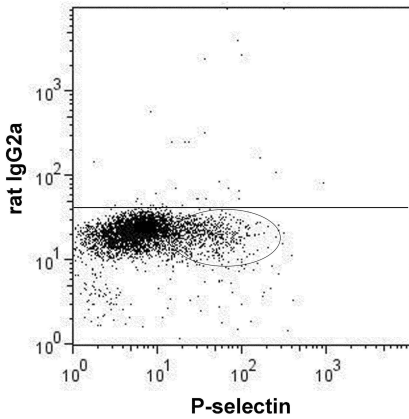**F**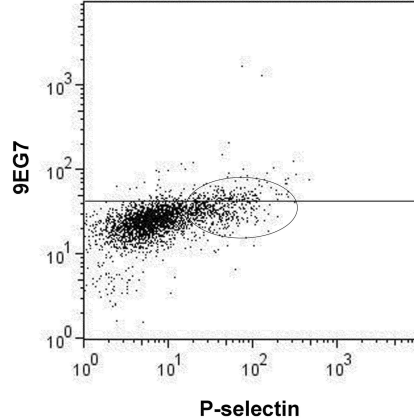

Figure E1

TSP-1

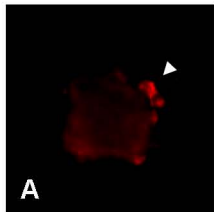

MBP

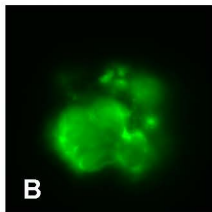

phase

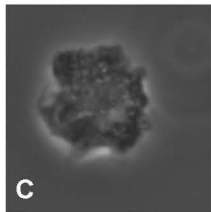

$\alpha$ IIb

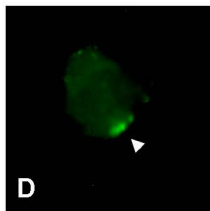

phase

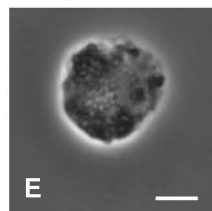

Figure E2

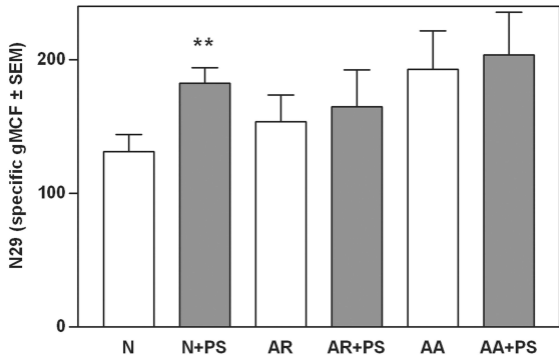

Figure E3

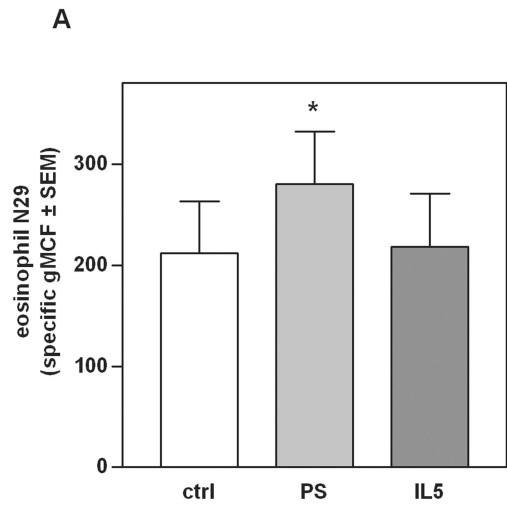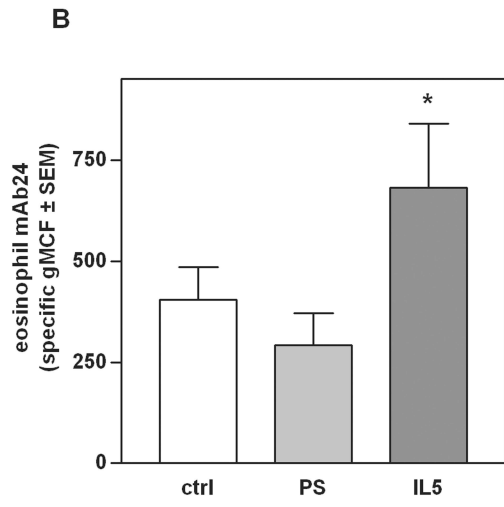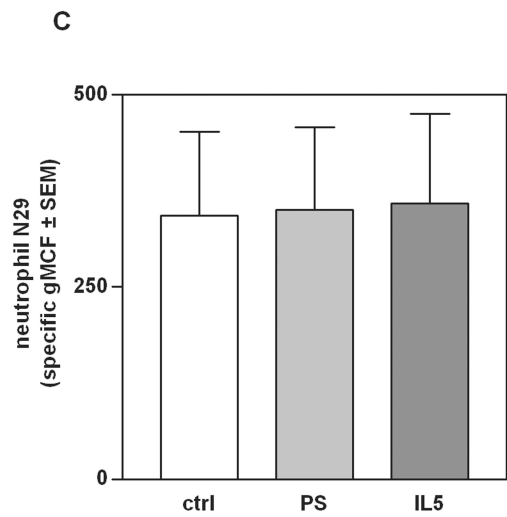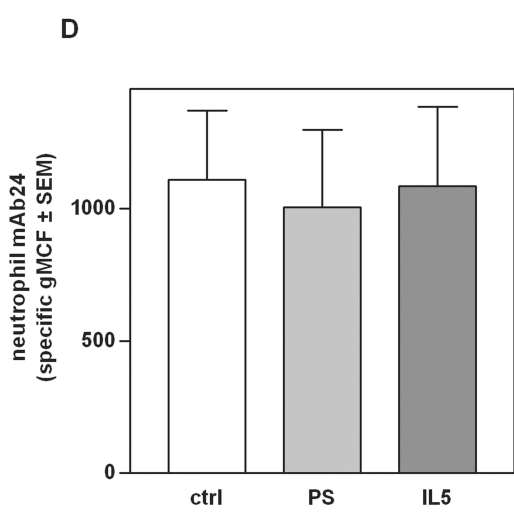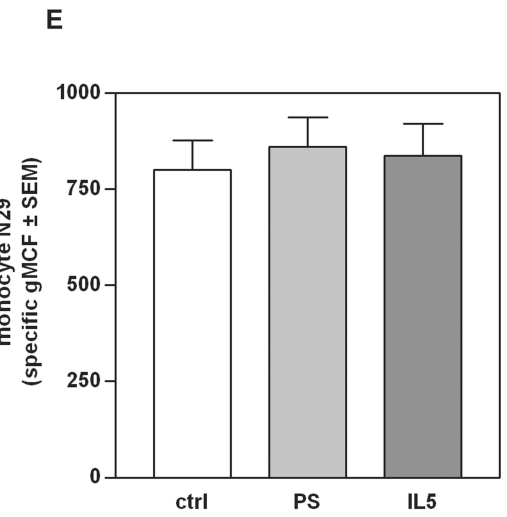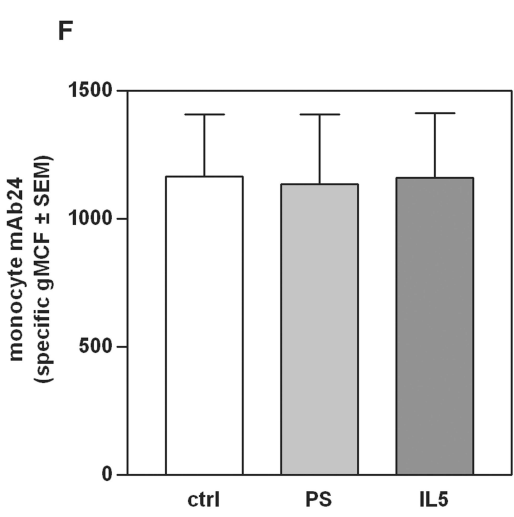

Figure E4

Supplement: supp_45_4_889__2.pdf [file supp_45_4_889__2.pdf]
